# Supplementary material for: Ergot alkaloid biosynthesis in Aspergillus fumigatus: Conversion of chanoclavine-I aldehyde to festuclavine by the festuclavine synthase FgaFS in the presence of the old yellow enzyme FgaOx3
Source: Royal Society of Chemistry journal article supplement (doi:10.1039/c003823g), 2010-01-01
Supplement: c003823g.pdf [file c003823g.pdf]

## Electronic Supporting Information to:

### **Ergot alkaloid biosynthesis in *Aspergillus fumigatus*: Conversion of chanoclavine-I aldehyde to festuclavine by the festuclavine synthase FgaFS in the presence of the old yellow enzyme FgaOx3**

Christiane Wallwey <sup>a</sup>, Marco Matuschek <sup>a</sup>, Xiu-Lan Xie <sup>b</sup> and Shu-Ming Li <sup>a</sup> \*

<sup>a</sup> *Philipps-Universität Marburg, Institut für Pharmazeutische Biologie und Biotechnologie, Deutschhausstrasse 17A, D-35037 Marburg, Germany. Email: shuming.li@Staff.uni-Marburg.de, Tel: 0049-6421-2822461, Fax: 0049-6421-2825365*

<sup>b</sup> *Philipps-Universität Marburg, Fachbereich Chemie, Hans-Meerwein-Strasse, 35032 Marburg, Germany.*

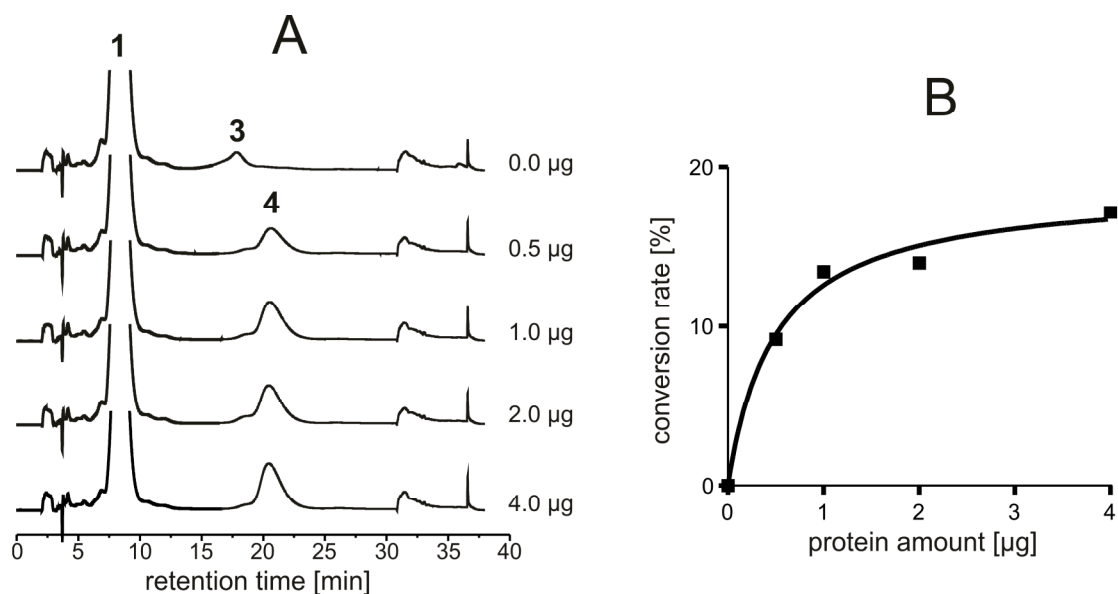

**Figure S1** Protein dependence of the product formation of the FgaFS reaction. The assays (100 µl) contained 1 mM chanoclavine-I, 5 mM  $\text{NAD}^+$ , 5 µg (0.42 µM) of FgaDH, 5 mM FMN, 5 mM NADH, 5 µg (1.2 µM) of FgaOx3 and different amounts of FgaFS. The incubation time was 3 hours.

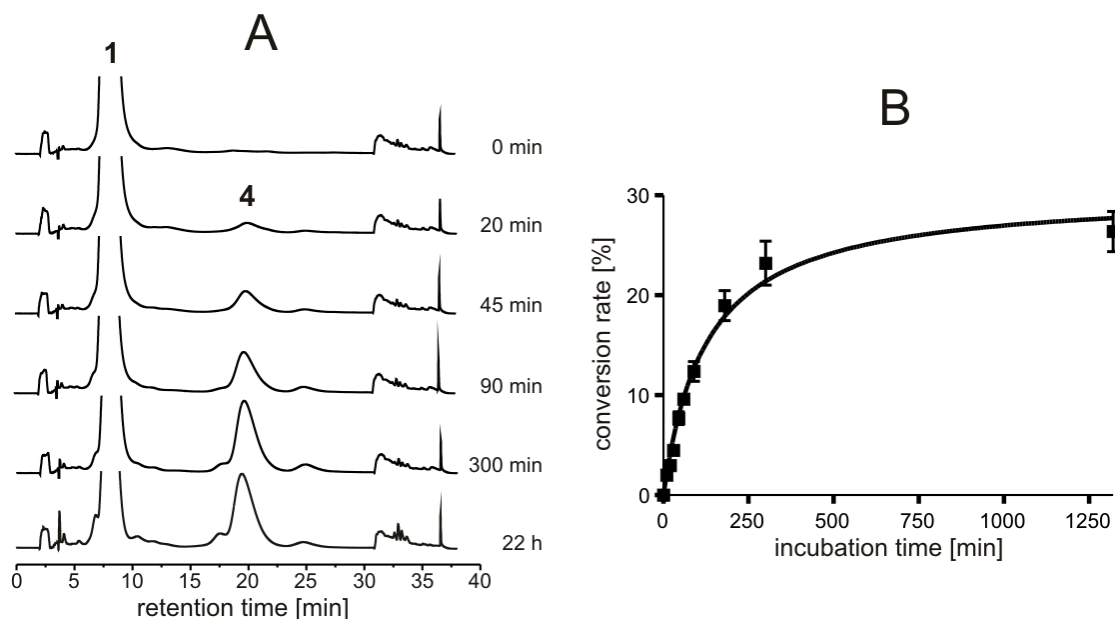

**Figure S2** Time dependence of the product formation of the FgaFS reaction. The assays (100 µl) contained 1 mM chanoclavine-I, 5 mM  $\text{NAD}^+$ , 5 µg (0.42 µM) of FgaDH, 5 mM FMN, 5 mM NADH, 5 µg (1.2 µM) of FgaOx3 and 1.5 µg (450 nM) of FgaFS.

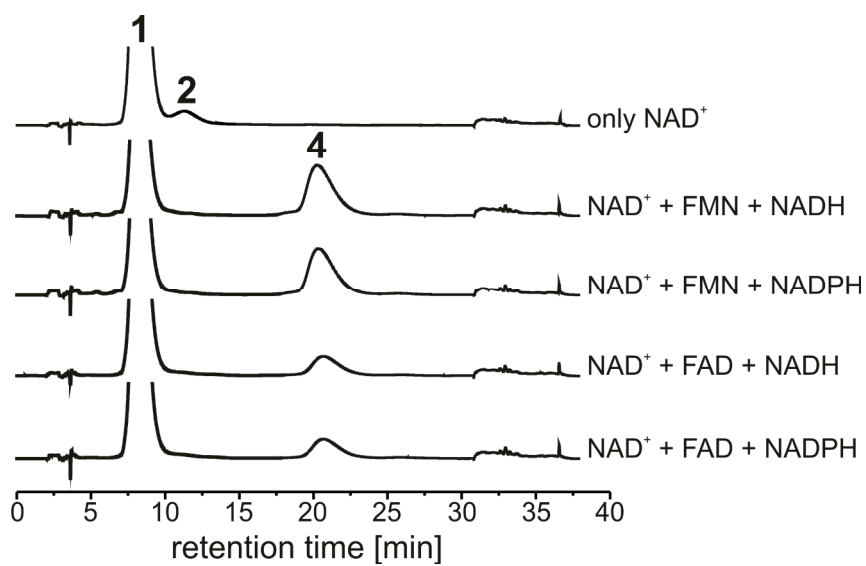

**Figure S3** Dependence of the product formation of the FgaFS reaction on cofactors. The assays (100  $\mu\text{l}$ ) contained 1 mM chanoclavine-I, 5  $\mu\text{g}$  (0.42  $\mu\text{M}$ ) of FgaDH, 5  $\mu\text{g}$  (1.2  $\mu\text{M}$ ) of FgaOx3, 5  $\mu\text{g}$  (1.5  $\mu\text{M}$ ) of FgaFS and 5 mM of each cofactor. The incubation time was 1 hour.

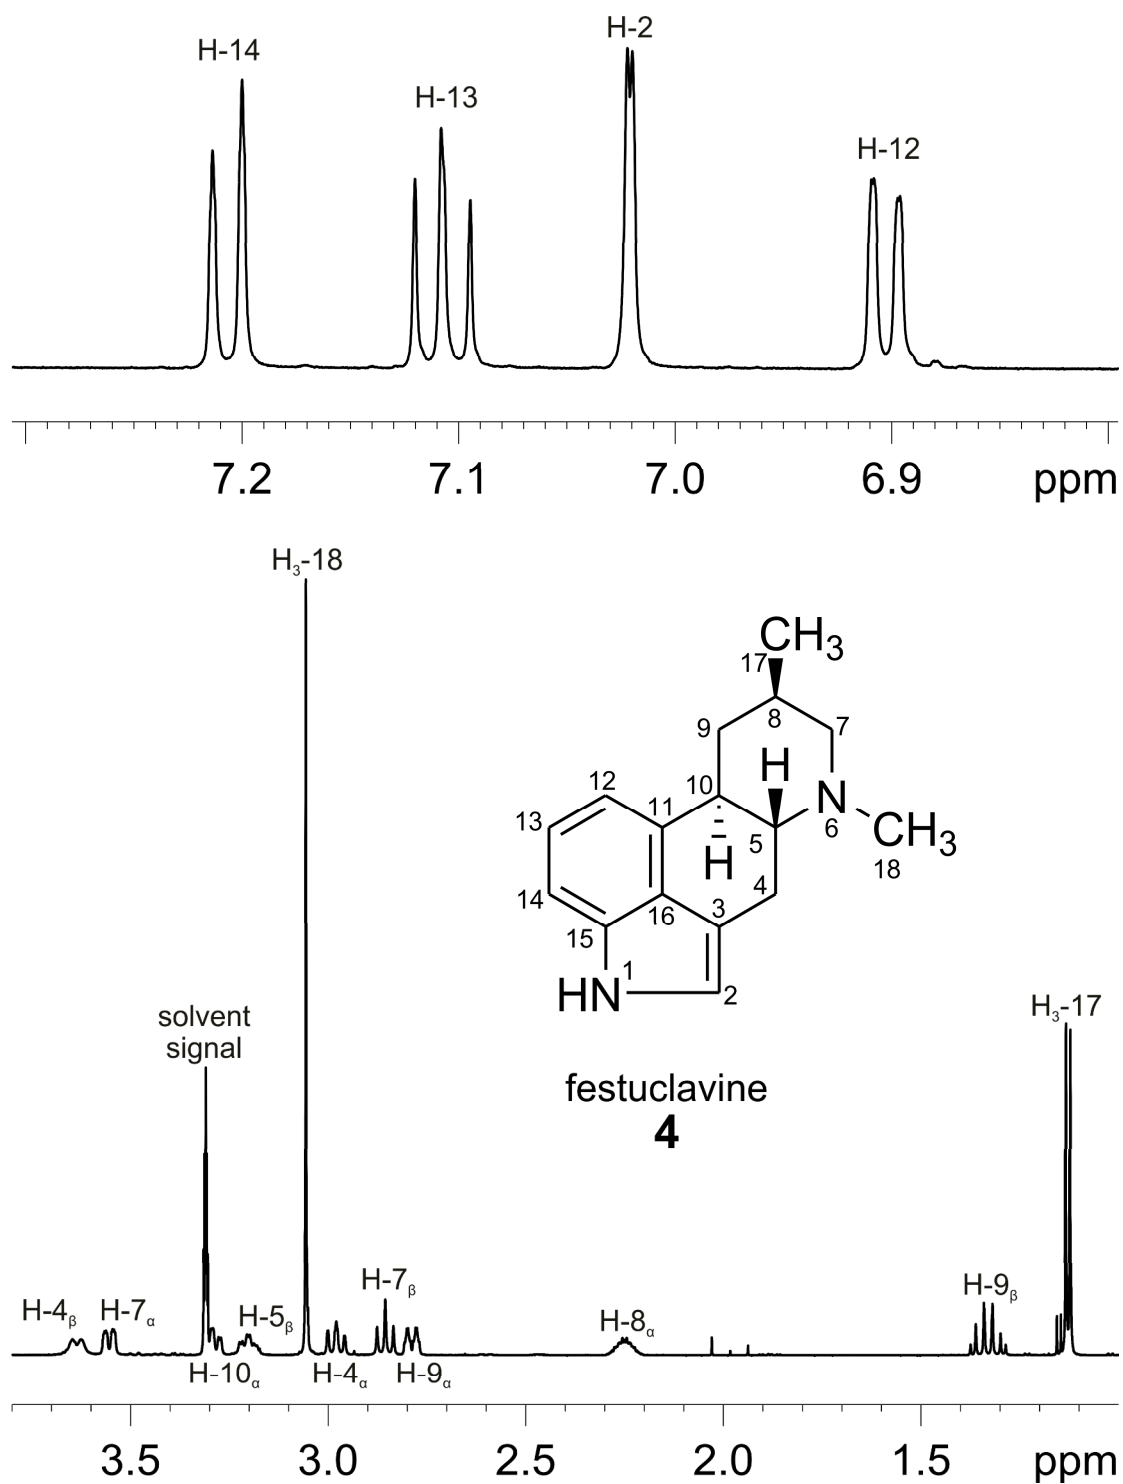

**Figure S4**  $^1\text{H-NMR}$  spectrum of **4** in protonated form in  $\text{CD}_3\text{OD}$

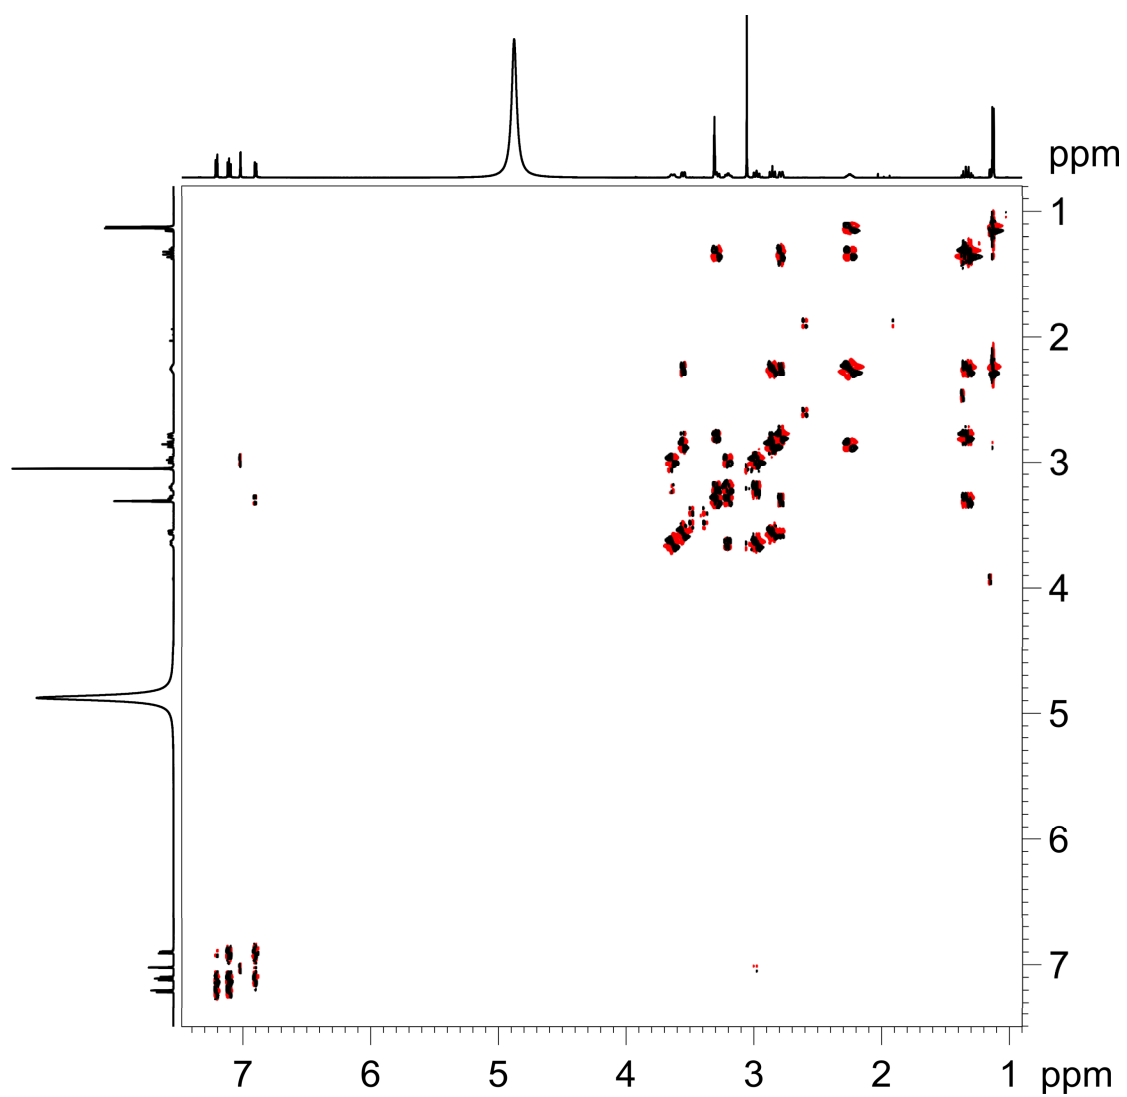

Figure S5 DQF-COSY spectrum of **4** in protonated form in CD<sub>3</sub>OD

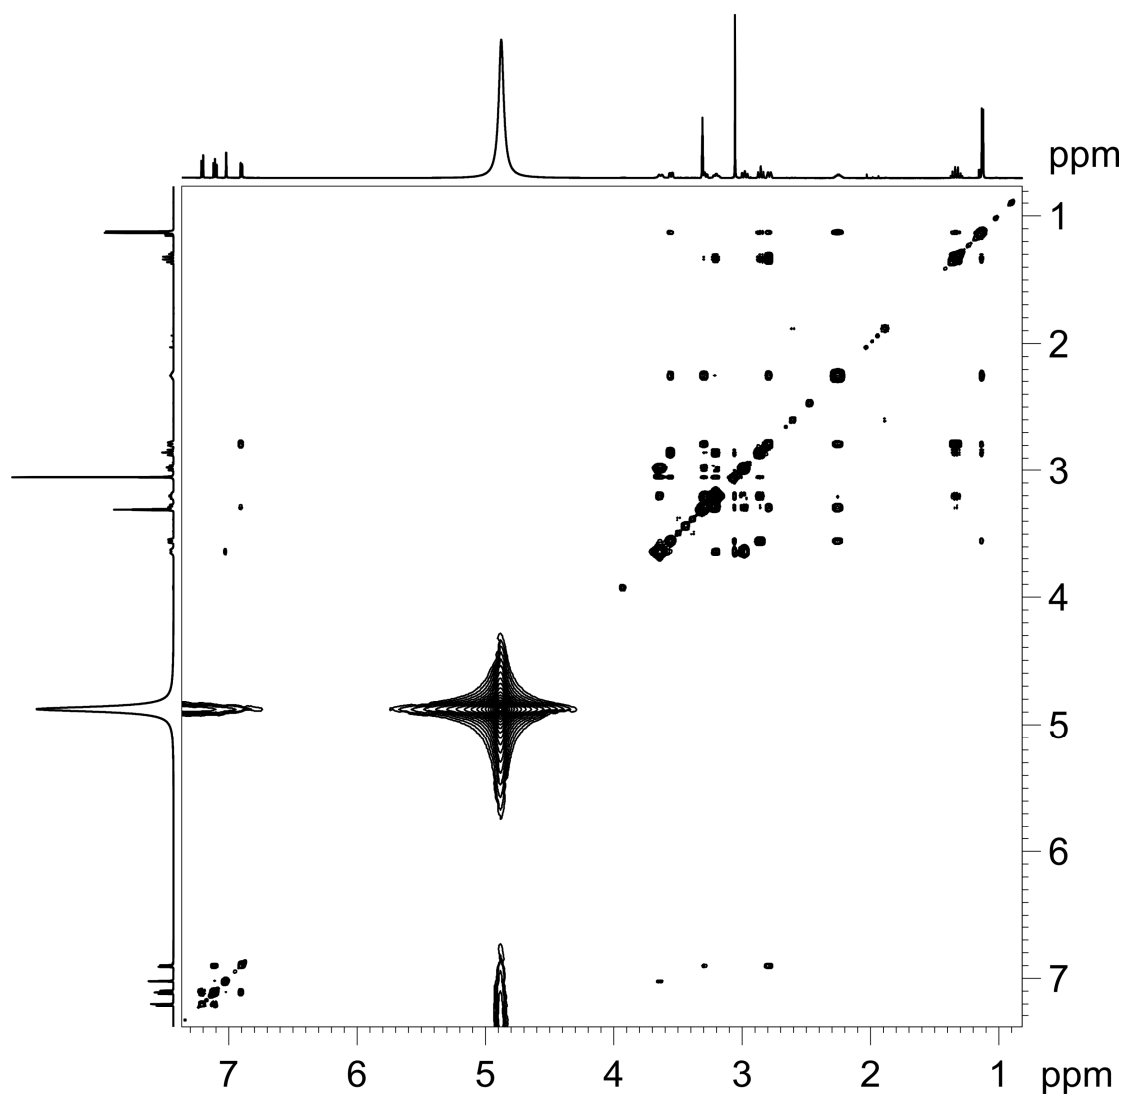

**Figure S6** NOESY spectrum of **4** in protonated form in CD<sub>3</sub>OD

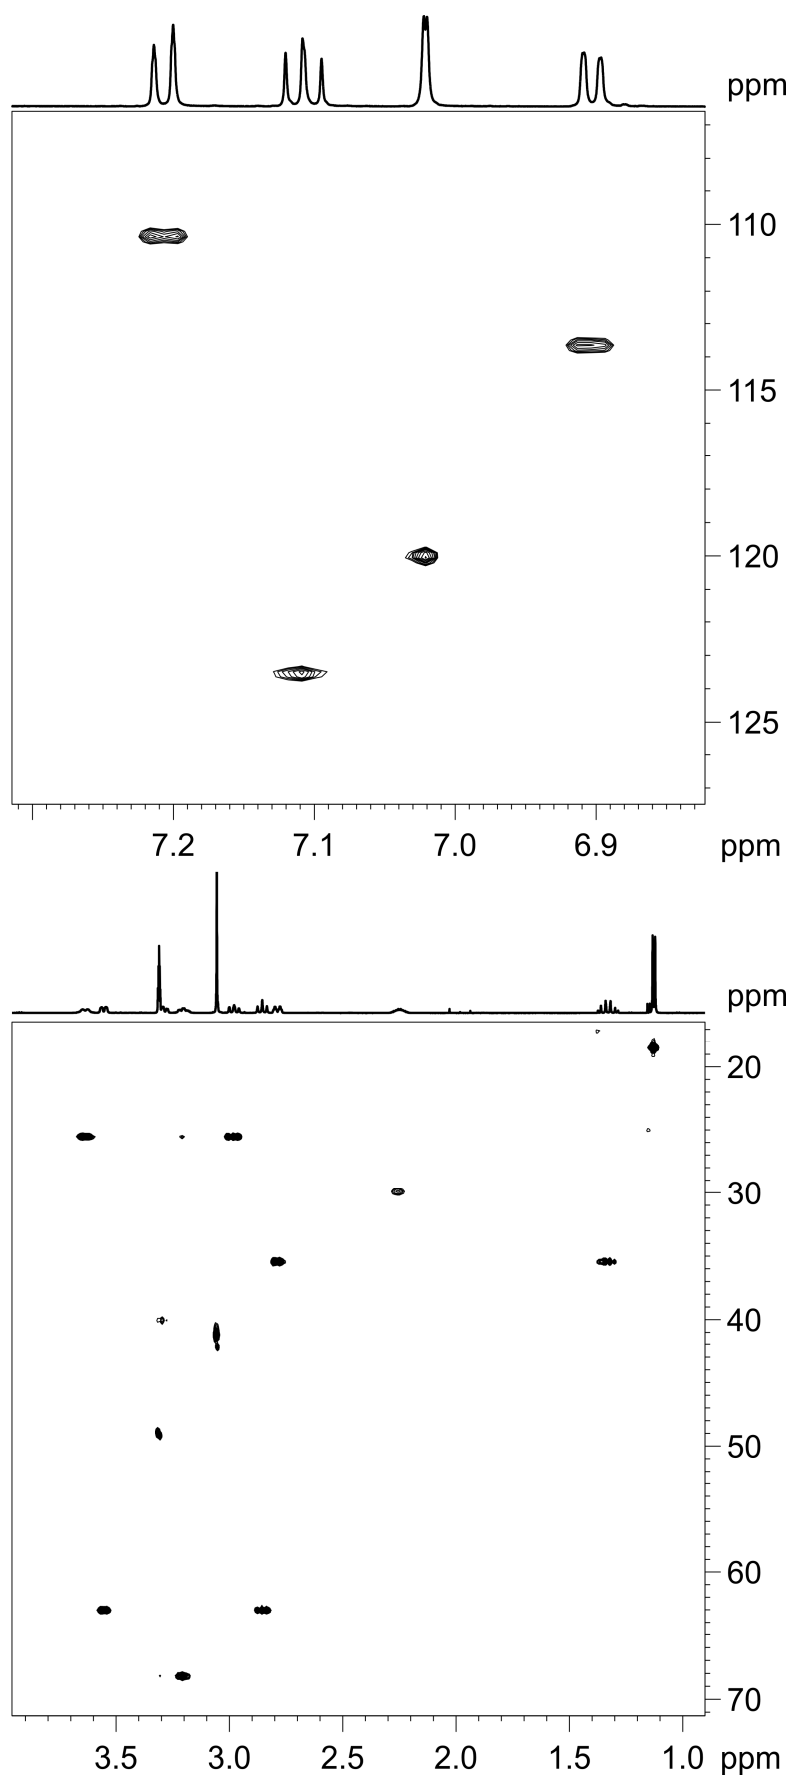

**Figure S7** Enhanced parts of the HSQC spectrum of **4** in protonated form in CD<sub>3</sub>OD

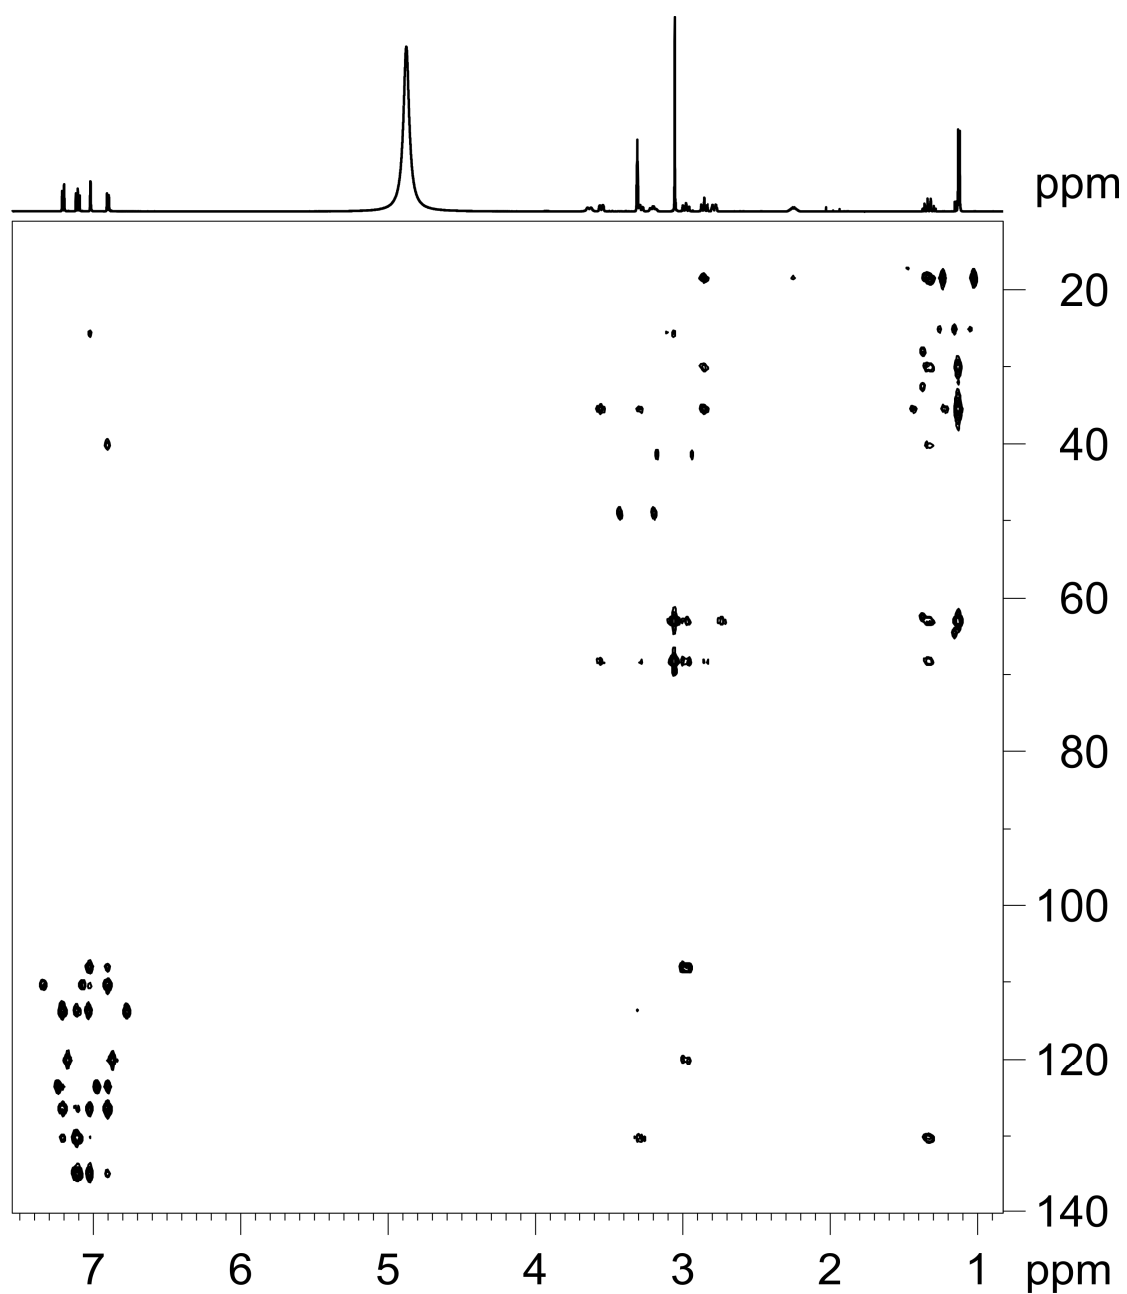

Figure S8 HMBC spectrum of 4 in protonated form in CD<sub>3</sub>OD



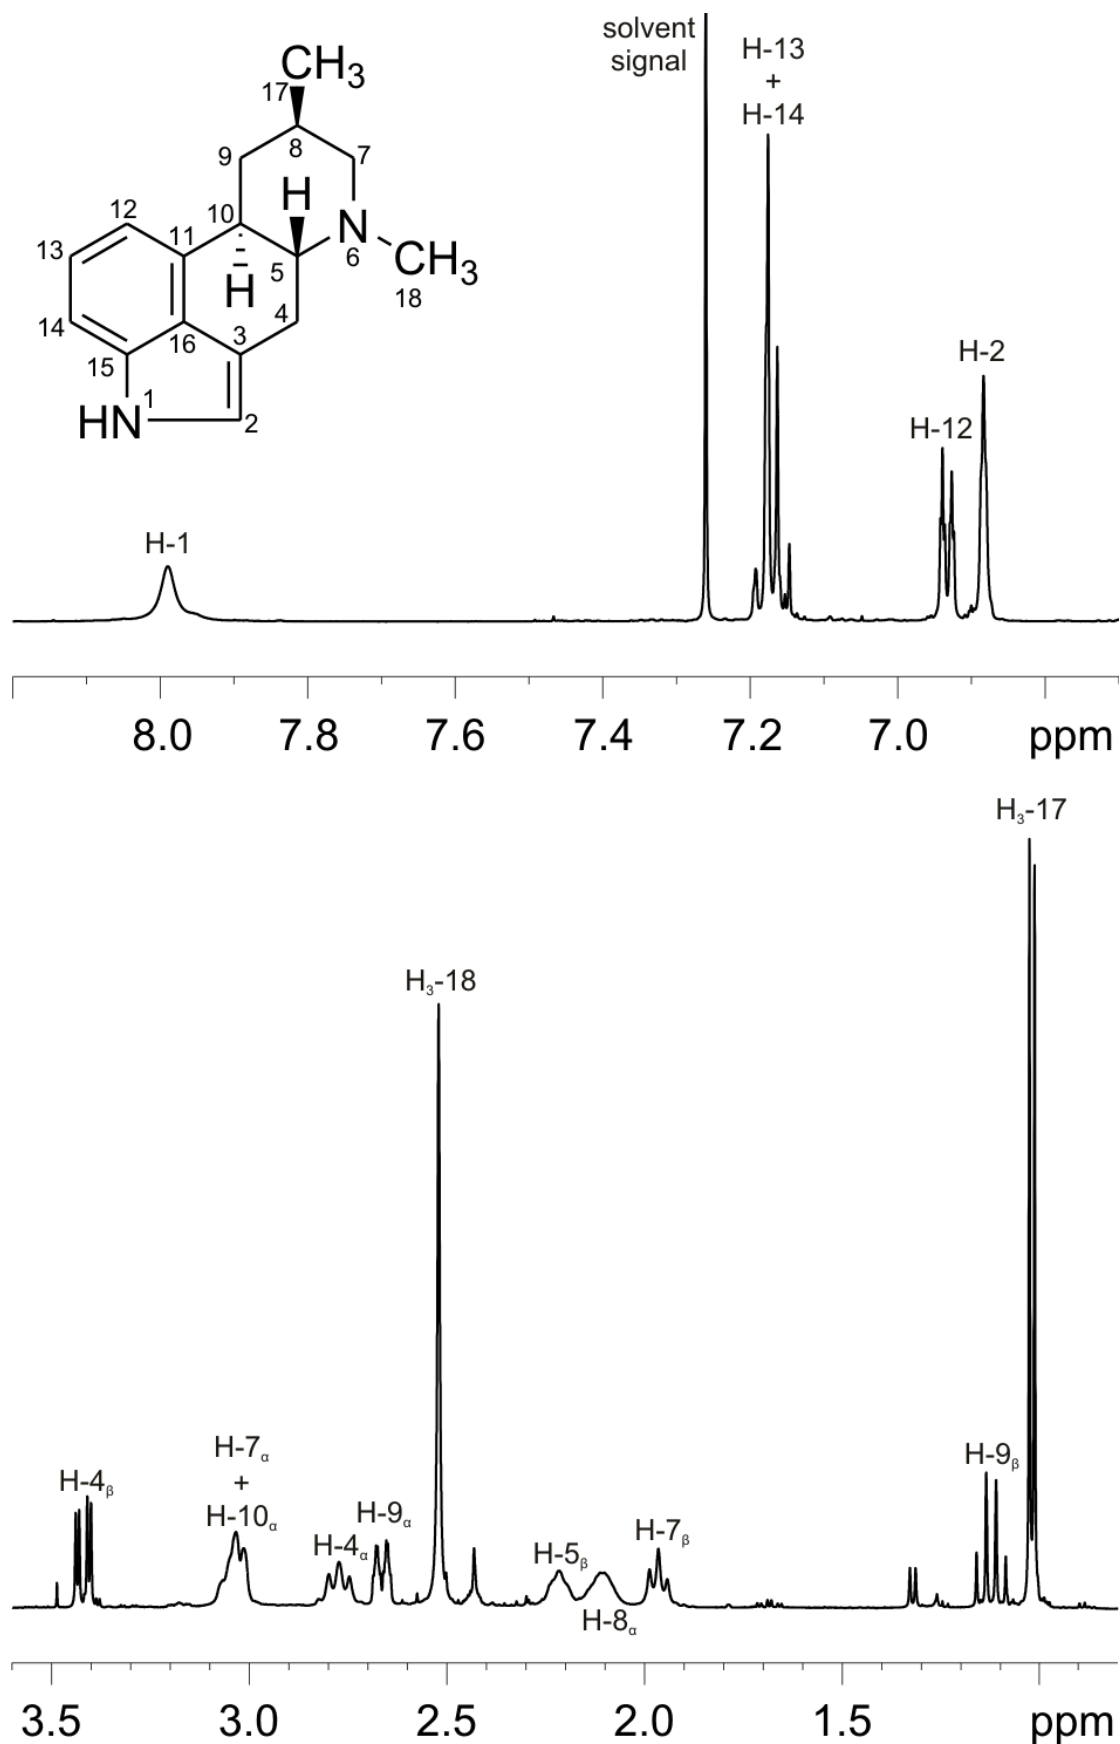

Figure S9  $^1\text{H-NMR}$  spectrum of authentic festuclavine as free base in  $\text{CDCl}_3$

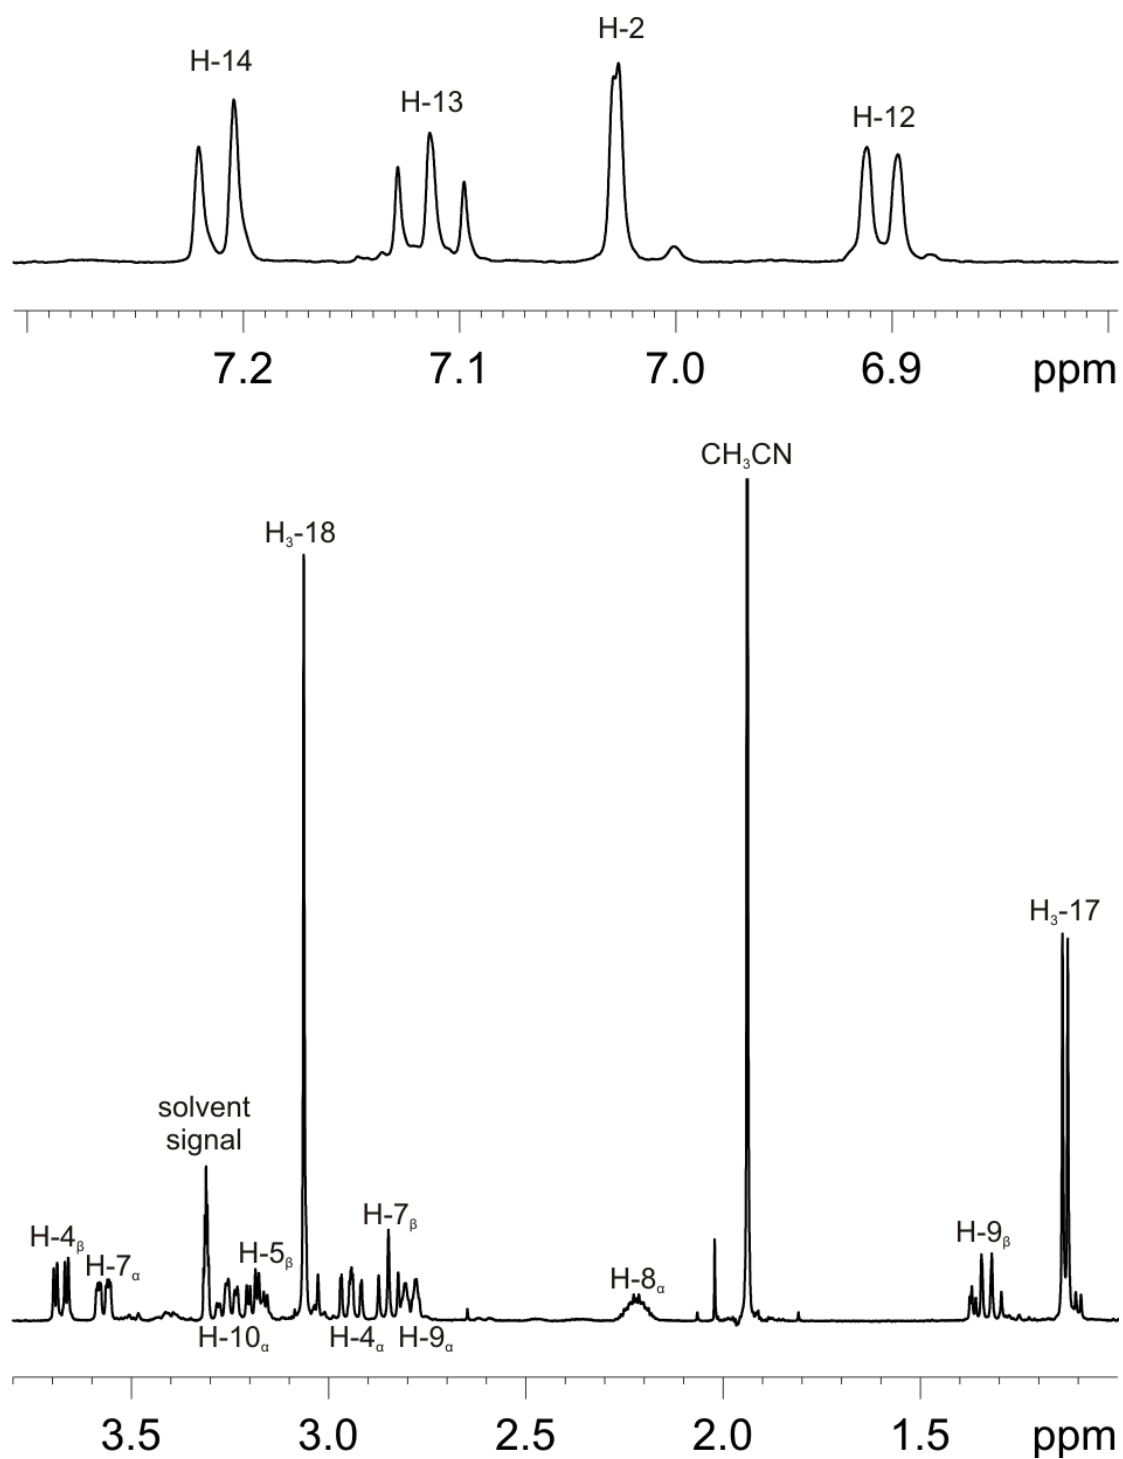

**Figure S10** <sup>1</sup>H-NMR spectrum of authentic festuclavine in protonated form in CD<sub>3</sub>OD  
The sample of authentic festuclavine as free base was treated after NMR measurement in CDCl<sub>3</sub> with HPLC solvents containing CH<sub>3</sub>CN and 0.5 % trifluoroacetic acid and evaporated to dryness.
